# Supplementary material
Source: PubMed Central journal article supplement (PMC8360383)
Supplement: NIHMS1728087-supplement-Supporting_Information.pdf [file NIHMS1728087-supplement-Supporting_Information.pdf]

# Supporting Information for

## PASSer: Prediction of Allosteric Sites Server

Hao Tian,<sup>†</sup> Xi Jiang,<sup>‡</sup> and Peng Tao<sup>\*,†</sup>

*<sup>†</sup>Department of Chemistry, Center for Research Computing, Center for Drug Discovery, Design, and Delivery (CD4), Southern Methodist University, Dallas, Texas, United States of America*

*<sup>‡</sup>Department of Statistical Science, Southern Methodist University, Dallas, Texas, United States of America*

E-mail: [ptao@smu.edu](mailto:ptao@smu.edu)

**Table S1.** Summarization of 90 selected proteins in alphabetical order of PDB ID.

| No. | Protein name                                               | PDB ID |
|-----|------------------------------------------------------------|--------|
| 1   | GLUTAMINE PHOSPHORIBOSYLPYROPHOSPHATE AMIDOTRANSFERASE     | 1AO0   |
| 2   | PROTEIN (CARBAMOYL-PHOSPHATE SYNTHASE)                     | 1CE8   |
| 3   | PROTEIN (GLYCEROL-3-PHOSPHATE CYTIDYLYLTRANSFERASE)        | 1COZ   |
| 4   | VITAMIN D NUCLEAR RECEPTOR                                 | 1DB1   |
| 5   | INDUCIBLE NITRIC OXIDE SYNTHASE                            | 1DD7   |
| 6   | LAC REPRESSOR                                              | 1EFA   |
| 7   | CYTOCHROME P450ERYF                                        | 1EGY   |
| 8   | PANTOTHENATE KINASE                                        | 1ESM   |
| 9   | FK506-BINDING PROTEIN                                      | 1FAP   |
| 10  | FRUCTOSE-1,6-BISPHOSPHATASE                                | 1FTA   |
| 11  | ANNEXIN V                                                  | 1HAK   |
| 12  | ANTHRANILATE SYNTHASE                                      | 1I7S   |
| 13  | groEL protein                                              | 1KP8   |
| 14  | L-LACTATE DEHYDROGENASE                                    | 1LDN   |
| 15  | L-LACTATE DEHYDROGENASE (T- AND R- STATE TETRAMER COMPLEX) | 1LTH   |
| 16  | Ribonucleoside-diphosphate reductase 2 alpha chain         | 1PEQ   |
| 17  | PHOSPHOFRUCTOKINASE                                        | 1PFK   |
| 18  | NAD-dependent malic enzyme, mitochondrial                  | 1PJ3   |
| 19  | ACETYLCHOLINESTERASE                                       | 1QTI   |
| 20  | Parathion hydrolase                                        | 1QW7   |
| 21  | Integrin alpha-L                                           | 1RD4   |
| 22  | DIHYDROFOLATE REDUCTASE                                    | 1RX2   |
| 23  | Dual specificity mitogen-activated protein kinase kinase 1 | 1S9J   |
| 24  | Caspase-7                                                  | 1SHJ   |
| 25  | Protein-tyrosine phosphatase, non-receptor type 1          | 1T49   |
| 26  | Aspartate carbamoyltransferase catalytic chain             | 1TUG   |
| 27  | glucokinase isoform 2                                      | 1V4S   |
| 28  | STALKED-CELL DIFFERENTIATION CONTROLLING PROTEIN           | 1W25   |
| 29  | ACETYL-COENZYME A CARBOXYLASE                              | 1W96   |

Continued on next page

**Table S1 – continued from previous page**

| No. | Protein name                                                                  | PDB ID |
|-----|-------------------------------------------------------------------------------|--------|
| 30  | Kinesin-like protein KIF11                                                    | 1X88   |
| 31  | ribonucleotide reductase, B12-dependent                                       | 1XJE   |
| 32  | Retinoic acid receptor RXR-alpha                                              | 1XLS   |
| 33  | Probable uracil phosphoribosyltransferase                                     | 1XTU   |
| 34  | Glycogen phosphorylase, muscle form                                           | 1Z8D   |
| 35  | Copper-containing nitrite reductase                                           | 1ZDS   |
| 36  | Glutamate receptor 2                                                          | 2AL4   |
| 37  | URIDYLATE KINASE                                                              | 2BND   |
| 38  | PYRUVATE DEHYDROGENSAE KINASE ISOENZYME 2                                     | 2BU2   |
| 39  | THREONINE SYNTHASE 1, CHLOROPLASTIC                                           | 2C2B   |
| 40  | Tryptophan synthase alpha chain                                               | 2CLH   |
| 41  | Hemoglobin alpha subunit                                                      | 2D5Z   |
| 42  | BirA bifunctional protein                                                     | 2EWN   |
| 43  | Epidermal growth factor receptor                                              | 2GS7   |
| 44  | D-alanine-D-alanine ligase                                                    | 2I80   |
| 45  | Mevalonate kinase                                                             | 2OI2   |
| 46  | isomerase domain of glutamine-fructose-6-phosphate transaminase (isomerizing) | 2POC   |
| 47  | PROTEIN (PURINE REPRESSOR)                                                    | 2PUC   |
| 48  | Phenylpyruvate decarboxylase                                                  | 2Q5O   |
| 49  | Pyruvate carboxylase protein                                                  | 2QF7   |
| 50  | RIBONUCLEOTIDE REDUCTASE R1 PROTEIN                                           | 2R1R   |
| 51  | 5'-AMP-ACTIVATED PROTEIN KINASE CATALYTIC SUBUNIT ALPHA-1                     | 2V92   |
| 52  | PYRUVATE KINASE ISOZYMES R/L                                                  | 2VGI   |
| 53  | METHIONYL-TRNA SYNTHETASE                                                     | 2X1L   |
| 54  | MYOSIN-2 HEAVY CHAIN                                                          | 2XO8   |
| 55  | 2-C-METHYL-D-ERYTHRITOL 4-PHOSPHATE CYTIDYLYLTRANSFERASE, CHLOROPLASTIC       | 2YC3   |
| 56  | cAMP and cAMP-inhibited cGMP 3',5'-cyclic phosphodiesterase 10A               | 2ZMF   |
| 57  | POL polyprotein                                                               | 3AO1   |
| 58  | UDP-N-acetylglucosamine 2-epimerase                                           | 3BEO   |

Continued on next page

**Table S1 – continued from previous page**

| No. | Protein name                                          | PDB ID |
|-----|-------------------------------------------------------|--------|
| 59  | 6-phosphofructokinase isozyme 2                       | 3CQD   |
| 60  | Isocitrate dehydrogenase kinase/phosphatase           | 3EPS   |
| 61  | Proto-oncogene tyrosine-protein kinase Src            | 3F3V   |
| 62  | Alpha-isopropylmalate synthase                        | 3F6G   |
| 63  | 2-isopropylmalate synthase                            | 3FIG   |
| 64  | RTX toxin RtxA                                        | 3FZY   |
| 65  | Mitogen-activated protein kinase 14                   | 3GCP   |
| 66  | Pyruvate kinase isozymes M1/M2                        | 3GR4   |
| 67  | Tyrosine-protein kinase ABL2                          | 3GVU   |
| 68  | Casein kinase II subunit alpha                        | 3H30   |
| 69  | Pyruvate carboxylase                                  | 3HO8   |
| 70  | Protein FimX                                          | 3HV8   |
| 71  | Reverse transcriptase/ribonuclease H                  | 3I0R   |
| 72  | cAMP-specific 3',5'-cyclic phosphodiesterase 4D       | 3IAD   |
| 73  | cAMP-dependent protein kinase catalytic subunit alpha | 3IDB   |
| 74  | Macrophage migration inhibitory factor                | 3IJG   |
| 75  | HD domain protein                                     | 3IRH   |
| 76  | DNA-directed RNA polymerase subunit alpha             | 3IYD   |
| 77  | Pantothenate kinase 3                                 | 3MK6   |
| 78  | Suppressor of kinetochore protein 1                   | 3MKS   |
| 79  | ORF 17                                                | 3NJQ   |
| 80  | Mitogen-activated protein kinase 8                    | 3O2M   |
| 81  | Estrogen receptor                                     | 3OS8   |
| 82  | Toxin B                                               | 3PEE   |
| 83  | UDP-glucose 6-dehydrogenase                           | 3PJG   |
| 84  | UDP-glucose 6-dehydrogenase                           | 3PTZ   |
| 85  | NMDA glutamate receptor subunit                       | 3QEL   |
| 86  | Ubiquitin-conjugating enzyme E2 R1                    | 3RZ3   |
| 87  | Glutaminase kidney isoform, mitochondrial             | 3UO9   |

Continued on next page

**Table S1 – continued from previous page**

| No. | Protein name                              | PDB ID |
|-----|-------------------------------------------|--------|
| 88  | GLUCOSE-1-PHOSPHATE THYMIDYLYLTRANSFERASE | 3ZLK   |
| 89  | LYSINE ACETYLTRANSFERASE                  | 4AVB   |
| 90  | CHAPERONE PROTEIN DNAK                    | 4B9Q   |

**Table S2.** 19 site descriptors calculated by FPocket.

| No. | Description                                  |
|-----|----------------------------------------------|
| 1   | Score                                        |
| 2   | Druggability score                           |
| 3   | Number of alpha spheres                      |
| 4   | Total solvent-accessible surface area (SASA) |
| 5   | Polar SASA                                   |
| 6   | Apolar SASA                                  |
| 7   | Volume                                       |
| 8   | Mean local hydrophobic density               |
| 9   | Mean alpha sphere radius                     |
| 10  | Mean alpha sphere solvent access             |
| 11  | Apolar alpha sphere proportion               |
| 12  | Hydrophobicity score                         |
| 13  | Volume score                                 |
| 14  | Polarity score                               |
| 15  | Charge scores                                |
| 16  | Proportion of polar atoms                    |
| 17  | Alpha sphere density                         |
| 18  | Centre of mass - alpha sphere max distance   |
| 19  | Flexibility                                  |

**Table S3.** The correlations between the original features and two additional ranking feature sets.

| Feature No. | Inner ranking | Overall ranking |
|-------------|---------------|-----------------|
| 1           | -0.7          | -0.8            |
| 2           | -0.5          | -0.5            |
| 3           | -0.6          | -0.7            |
| 4           | -0.8          | -0.8            |
| 5           | -0.8          | -0.8            |
| 6           | -0.8          | -0.8            |
| 7           | -0.7          | -0.8            |
| 8           | -0.8          | -0.9            |
| 9           | -0.9          | -1.0            |
| 10          | -0.9          | -1.0            |
| 11          | -0.9          | -1.0            |
| 12          | -0.9          | -1.0            |
| 13          | -0.9          | -1.0            |
| 14          | -0.8          | -0.8            |
| 15          | -0.9          | -0.9            |
| 16          | -0.9          | -1.0            |
| 17          | -0.9          | -0.9            |
| 18          | -0.9          | -0.9            |
| 19          | -0.6          | -1.0            |

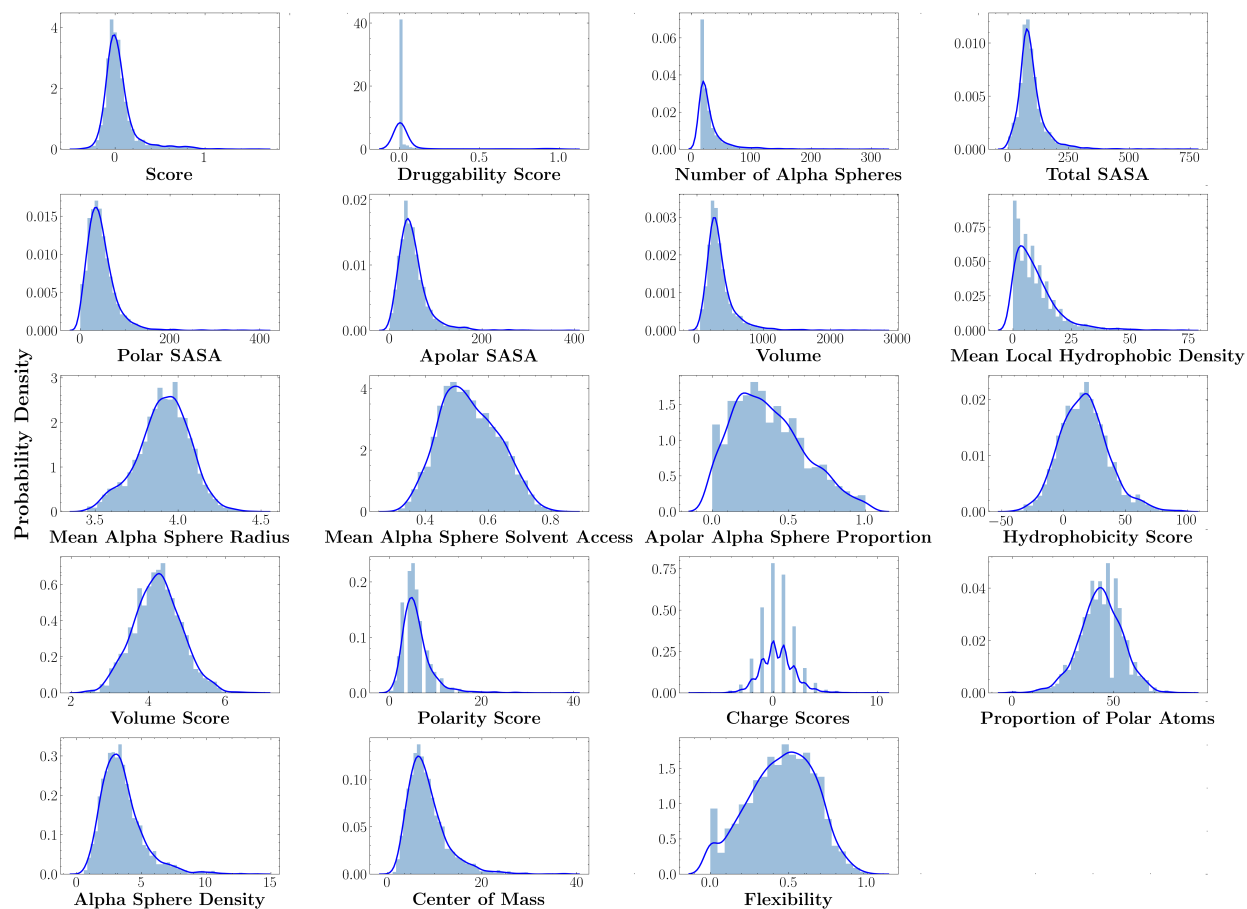

**Figure S1.** Feature value distribution. A histogram plot and a kernel density estimate (blue line) is shown for each feature calculated by FPocket.



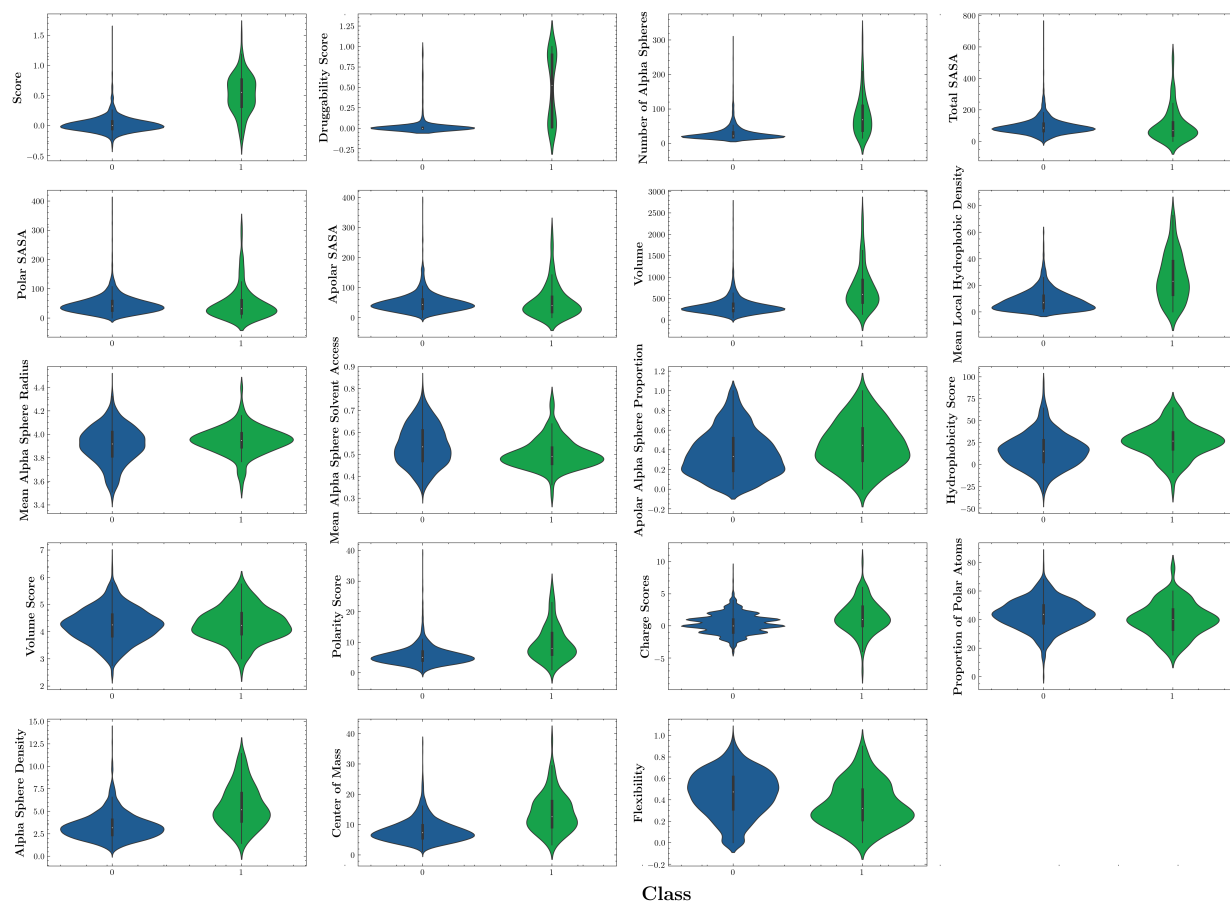

**Figure S2.** Violin plots. The distribution of allosteric pockets (class 1) and non-allosteric pockets (class 0) with probability density is plotted for each feature calculated by FPocket.

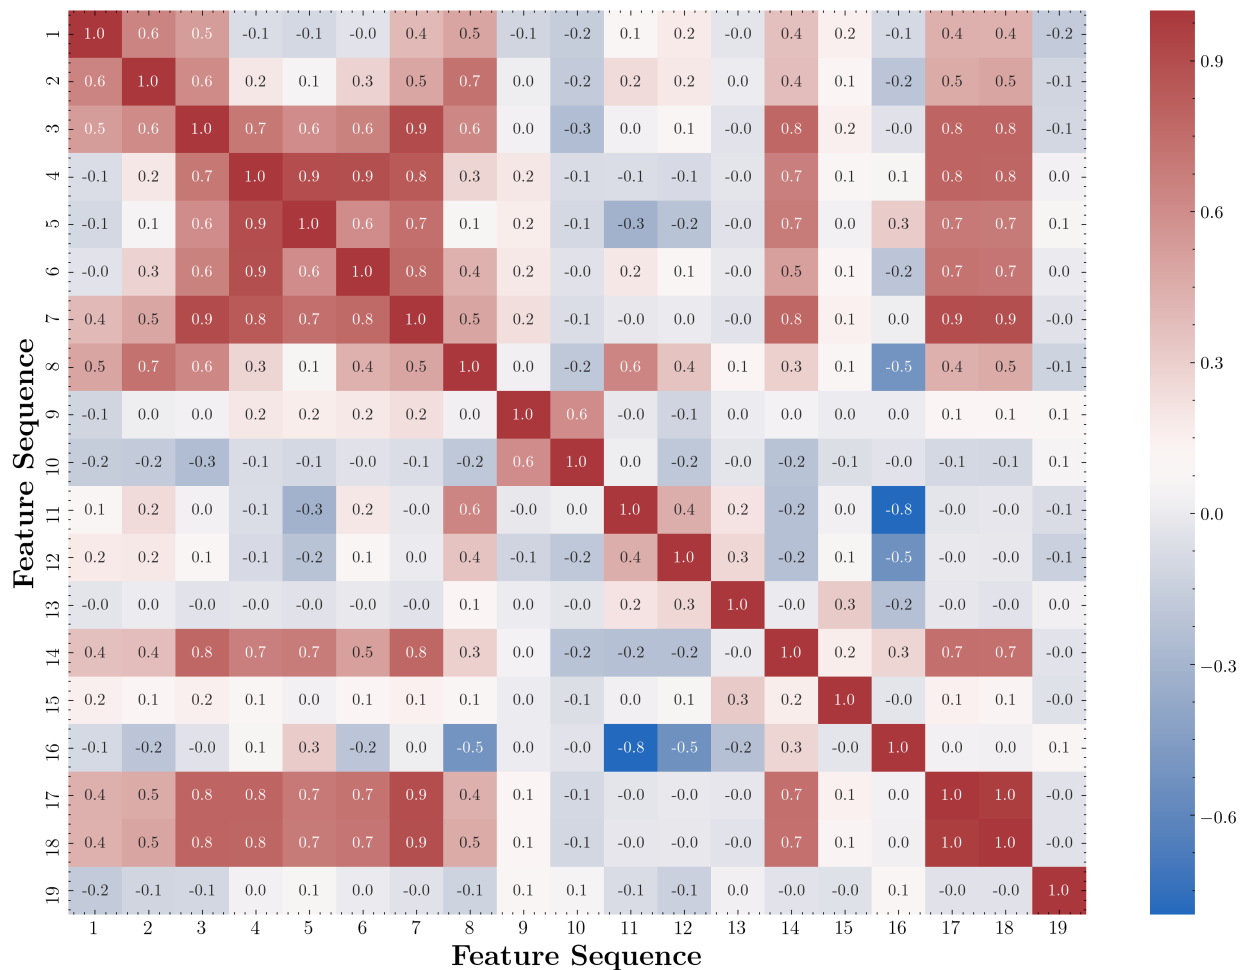

**Figure S3.** The correlation matrix of 19 features. The numbers in feature sequence correspond to the numbers in Table S2. The correlation matrix is symmetrical along the diagonal. White color represents no correlation between the two related features while red and blue represent positive and negative correlations, respectively. The darker the color, the greater the correlation.
